# Supplementary material for: Spatiotemporal variation characteristics of global fires and their emissions
Source: Copernicus journal article supplement (doi:10.5194/acp-23-7781-2023), 2023-07-14
Supplement: Supplementary file 1 [file acp-23-7781-2023-supplement.pdf]

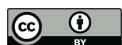

*Supplement of*

## **Spatiotemporal variation characteristics of global fires and their emissions**

**Hao Fan et al.**

*Correspondence to:* Chuanfeng Zhao (cfzhao@pku.edu.cn)

The copyright of individual parts of the supplement might differ from the article licence.

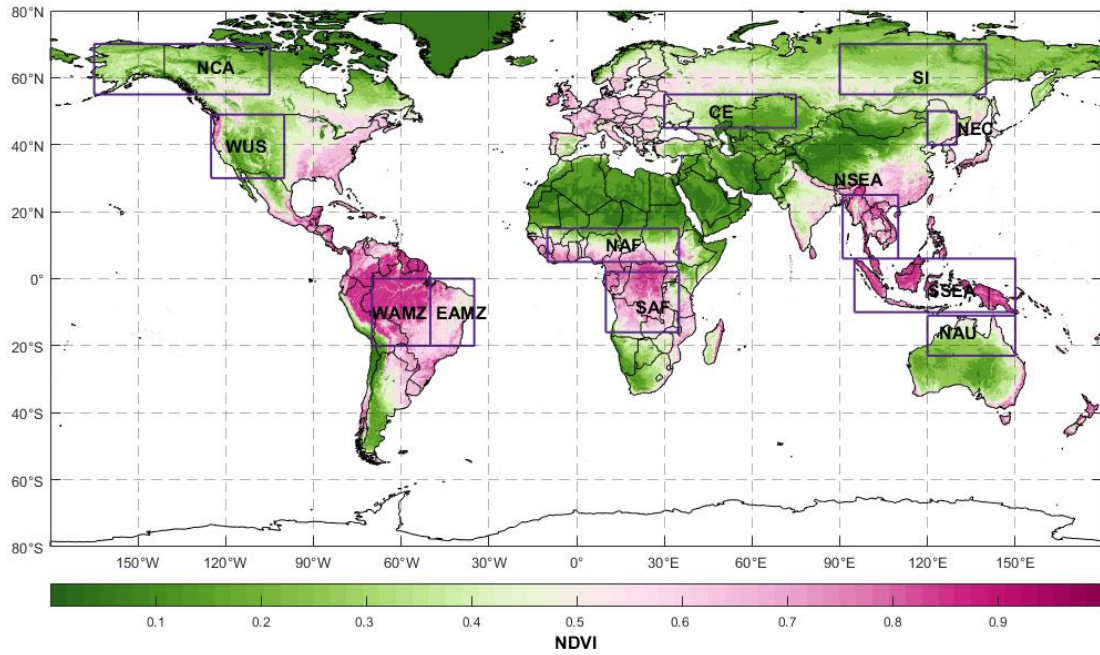

**Figure S1.** The distribution characteristics of global NDVI from 2001 to 2019, and the geographical location of 12 regions.

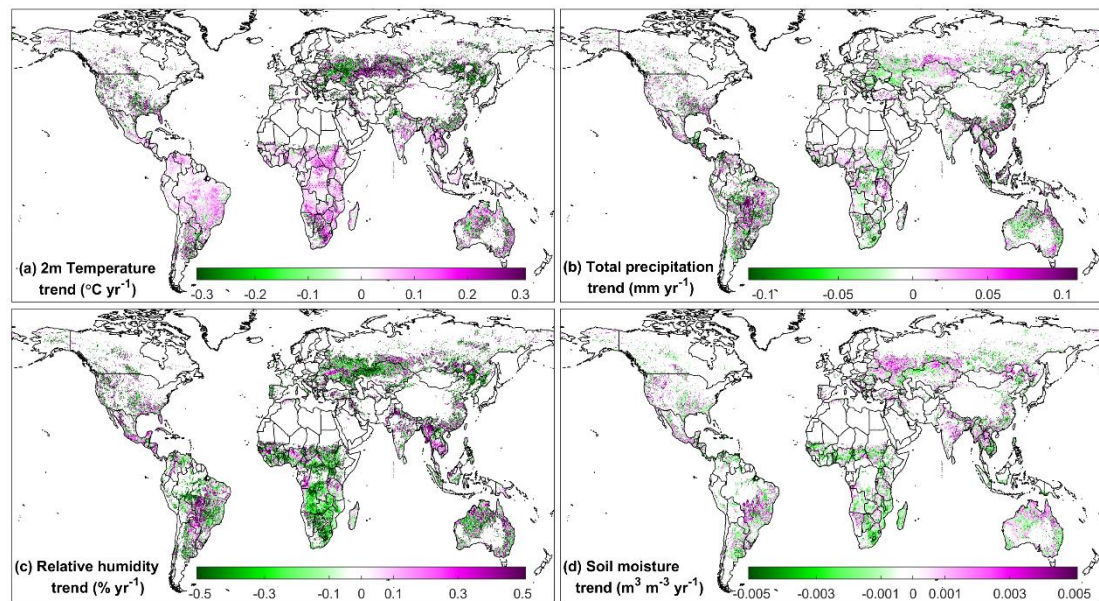

**Figure S2.** Change trend of temperature, total precipitation, relative humidity (1000 hpa) and soil moisture in the fire season from 2001 to 2019.

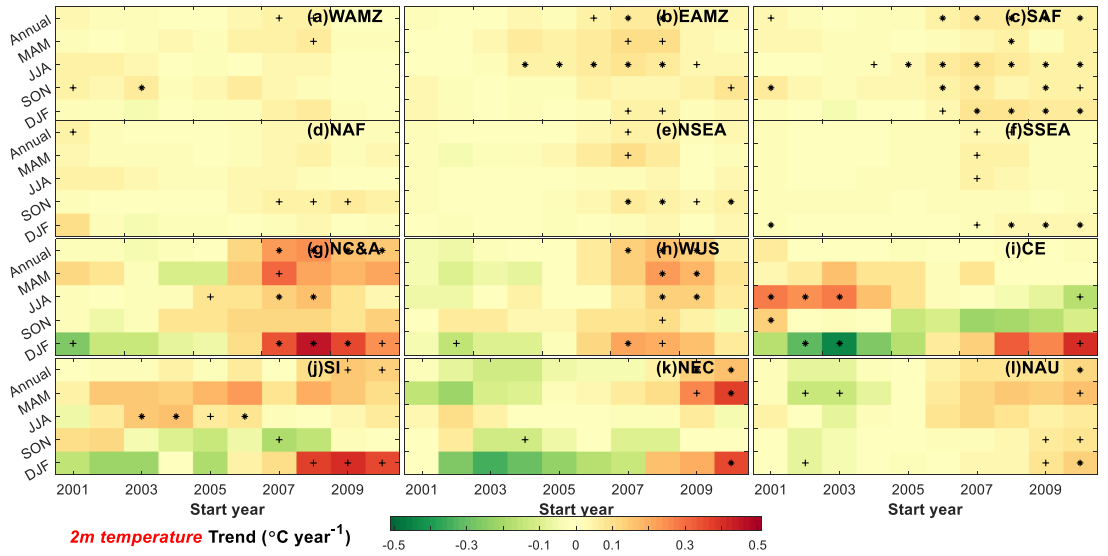

**Figure S3.** The 10-year sliding average change trend of temperature in typical area. The "\*" and "+" in the figure represent that the trend has passed the 95% and 90% significance tests. The year in the figure represents the starting year of the sliding average calculation.

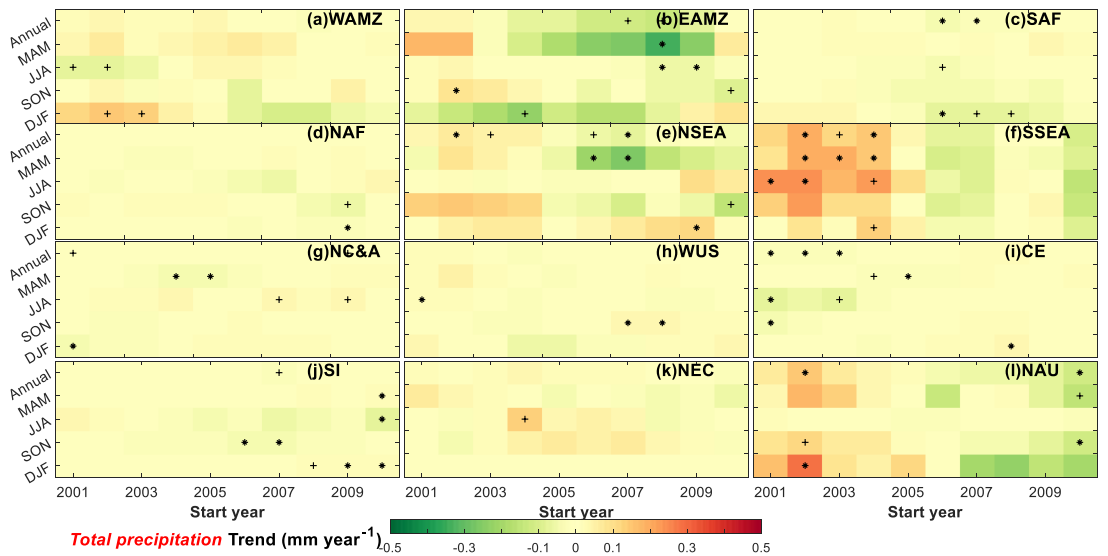

**Figure S4.** The 10-year sliding average change trend of total precipitation in typical area. The "\*" and "+" in the figure represent that the trend has passed the 95% and 90% significance tests. The year in the figure represents the starting year of the sliding average calculation.

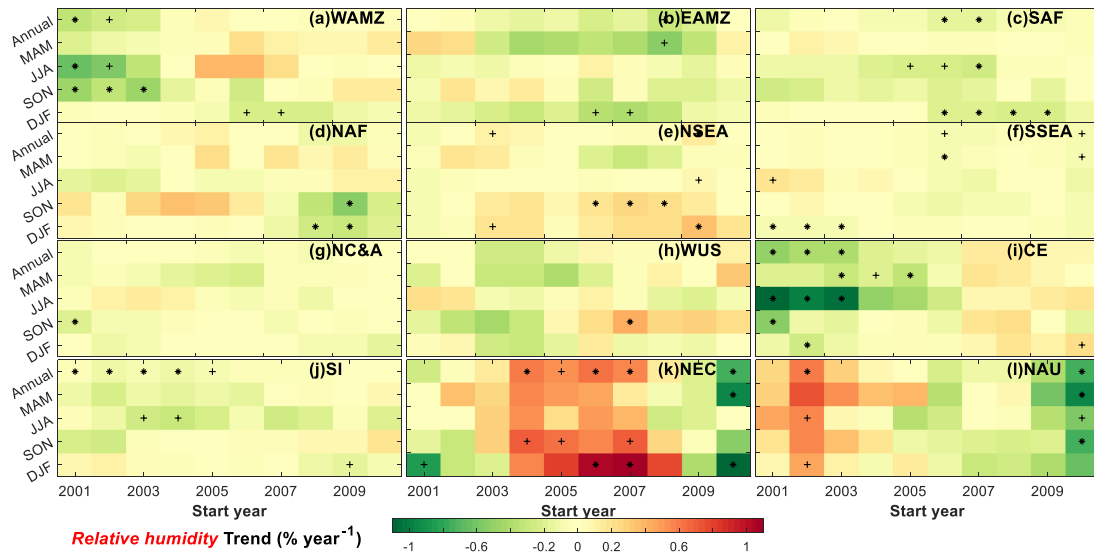

**Figure S5.** The 10-year sliding average change trend of relative humidity in typical area. The "\*" and "+" in the figure represent that the trend has passed the 95% and 90% significance tests. The year in the figure represents the starting year of the sliding average calculation.

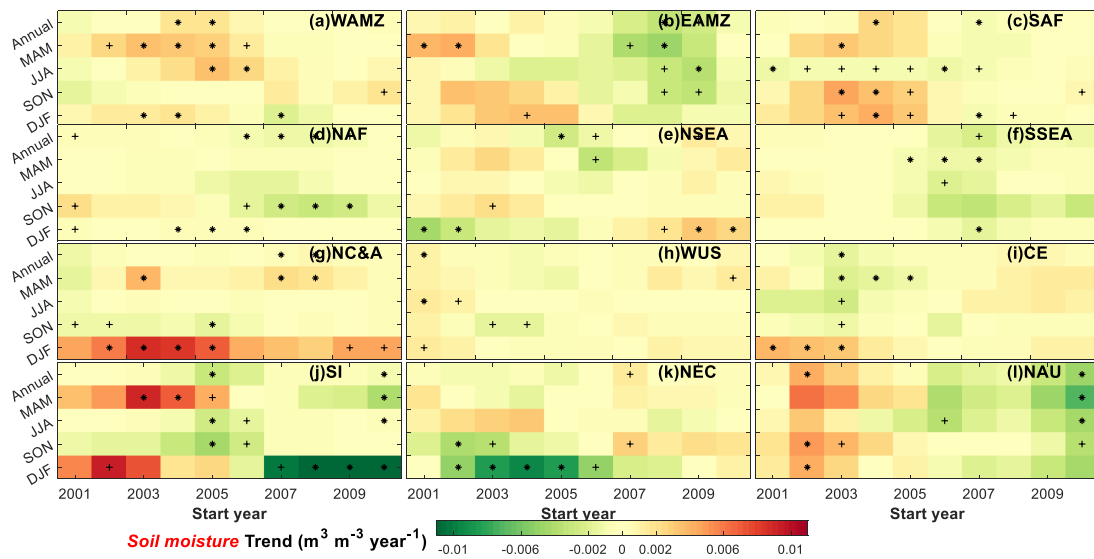

**Figure S6.** The 10-year sliding average change trend of soil moisture in typical area. The "\*" and "+" in the figure represent that the trend has passed the 95% and 90% significance tests. The year in the figure represents the starting year of the sliding average calculation.
